# Supplementary material
Source: Elsevier journal article supplement (https://www.sciencedirect.com/science/article/pii/S2013251418300555)
Supplement: mmc2 [file S2013251418300555:mmc2.docx]

**Tabla supl.2. Características de los pacientes según cuartiles de fósforo.**

| Cuartiles de fósforo (mg/dL) | <3,1  (N=413) | 3,1-3,9  (N=363) | 4,0-5,2  (N=404) | >5,2  (N=371) | p-valor |
| --- | --- | --- | --- | --- | --- |
| Edad (años) (N, media±SD) | 59,1±15,6 | 60,9±15,5 | 58,9±15,7 | 59,4±15,7 | 0,3 |
| Sexo (N, % hombres) | 51,7 | 56,5 | 54,2 | 53,6 | 0,6 |
| Tiempo en diálisis (meses) (N, media±SD) | 57,4±52,1 | 55,8±50,4 | 58,8±55,8 | 59,8±58,1 | 0,8 |
| Diabetes (N, %) | 30,8 | 31,8 | 30,6 | 28,5 | 0,8 |
| Paratiroidectomía (N, %) | 0 | 0 | 0,2 | 0 | 0,4 |
| Trasplante previo (N, %) | 0,7 | 1,7 | 1,5 | 1,6 | 0,6 |
| Horas de diálisis por semana (horas) (N, media±SD) | 10,5±0,2 | 10,5±0,2 | 10,5±0,2 | 10,5±0,1 | 0,7 |
| Concentración de calcio en el líquido de diálisis |  |  |  |  |  |
| 2,5 mEq/L (N, %) | 0 | 0 | 0 | 0 |  |
| 3,0 mEq/L (N, %) | 0 | 0 | 0 | 0 | -- |
| 3,5 mEq/L (N, %) | 100 | 100 | 100 | 100 |  |
| Prescripción de vitamina D activa (N, %) |  |  |  |  |  |
| Calcitriol (N,%) | 36,1 | 35,8 | 33,4 | 37,2 |  |
| Alfacalcidol (N,%) | 0 | 0 | 0 | 0 | 0,6 |
| Paricalcitol (N, %) | 1,7 | 1,9 | 1,0 | 0,5 |  |
| Prescripción de captores de fósforo |  |  |  |  |  |
| Calcio (N, %) | 66,3 | 65,3 | 70,5 | 68,7 |  |
| Sevelamer (N, %) | 1,0 | 1,4 | 0,7 | 1,3 | 0,6 |
| Lantano (N,%) | 0 | 0,3 | 0 | 0 |  |
| Calcio sérico (N, Media±SD) (mg/dL) | 9,3±0,6 | 9,3±0,7 | 9,4±0,7 | 9,5±0,8 | <0,001 |
| Calcio sérico corregido por albúmina (mg/dL) (N, Media±SD) | 9,4±0,7 | 9,2±0,7 | 9,3±0,7 | 9,3±0,8 | 0,018 |
| Fósforo sérico (mg/dL) (N, Media±SD) | 2,3±0,6 | 3,5±0,3 | 4,5±0,4 | 6,6±1,1 | <0,001 |
| PTH (pg/mL) (N, Mediana[IQR]) | 129,9[204,8] | 123,3[248,7] | 117,4[252,9] | 133,9[244,9] | 0,6 |
| PTH (pg/mL) (N, Media±SD) | 254,8±386,7 | 272,0±427,6 | 260,3±435,8 | 265,9±394,0 | 0,9 |
| Fosfatasa alcalina (UI/L) (N, Mediana[IQR]) | 121,0[91,0] | 108,0[64,0] | 119,5[69,5] | 107,0[68,0] | <0,001 |
| Fosfatasa alcalina (UI/L) (N, Media±SD) | 166,8±131,3 | 142,9±112,2 | 156,7±138,4 | 146,0±127,4 | 0,031 |
| Albúmina (g/dL) (N, Media±SD) | 3,9±0,5 | 4,1±0,4 | 4,1±0,4 | 4,2±0,3 | <0,001 |
| Hemoglobina (g/dL) (N, Media±SD) | 10,8±1,9 | 11,0±2,0 | 10,9±1,8 | 10,8±1,9 | 0,5 |
