# Supplementary material
Source: Elsevier journal article supplement (https://www.sciencedirect.com/science/article/pii/S2013251418300555)
Supplement: mmc3 [file S2013251418300555:mmc3.docx]

***Tabla supl. 3. Características de los pacientes diabéticos y no diabéticos.***

|  | Todos (N=1545) | No Diabéticos (N=1075) | Diabéticos (N=470) | p-valor |
| --- | --- | --- | --- | --- |
| Edad (años) (Media±DS) | 59,5±15,6 | 57,2±17,0 | 64,9±9,9 | <0,001 |
| Sexo (% de hombres) | 54,0 | 53,0 | 56,2 | 0,3 |
| Tiempo en diálisis (meses) (Media±DS) | 58,0±54,2 | 66,1±60,3 | 40,8±32,1 | <0,001 |
| PTH (pg/mL) (Mediana[IQR]) | 124,0[240,0] | 151,4[287,7] | 87,9[122,0] | <0,001 |
| PTH (pg/mL) (Media±DS) | 262,1±410,3 | 311,1±462,3 | 150,6±217,2 | <0,001 |
| KDOQI (categorías de PTH) |  |  |  |  |
| <150 (pg/mL) (%) | 56,4 | 49,4 | 72,3 | <0,001 |
| 150-300 (pg/mL) (%) | 18,9 | 20,4 | 15,3 |
| >300 (pg/mL) (%) | 24,7 | 30,2 | 12,3 |
| KDIGO (categorías de PTH) |  |  |  |  |
| <130 (pg/mL) (%) | 51,7 | 44,9 | 67,2 | <0,001 |
| 130-585 (pg/mL) (%) | 37,5 | 41,3 | 28,9 |
| >585 (pg/mL) (%) | 10,8 | 13,8 | 3,8 |
| Calcio (mg/dL) (Media±DS) | 9,4±0,7 | 9,4±0,7 | 9,3±0,7 | 0,7 |
| Calcio corregido (mg/dL) (Media±DS) | 9,3±0,7 | 9,3±0,7 | 9,3±0,7 | 0,5 |
| KDOQI (categorías de calcio corregido por albúmina) | | | | |
| <8,4 (mg/dL) (%) | 6,8 | 7,1 | 6,2 | 0,8 |
| 8,4-9,5 (mg/dL) (%) | 60,6 | 60,3 | 61,3 |
| >9,5 (mg/dL) (%) | 32,6 | 32,7 | 32,6 |
| KDIGO (categorías de calcio) |  |  |  |  |
| <8,5 (mg/dL) (%) | 7,8 | 8,2 | 6,8 | 0,3 |
| 8,5-10,2 (mg/dL) (%) | 82,2 | 81,2 | 84,5 |
| >10,2 (mg/dL) (%) | 10,0 | 10,6 | 8,7 |
| Fósforo (mg/dL) (Media±DS) | 4,2±1,7 | 4,2±1,7 | 4,1±1,7 | 0,4 |
| KDOQI (categorías de fósforo) |  |  |  |  |
| <3,5 (mg/dL) (%) | 37,3 | 36,6 | 38,9 | 0,6 |
| 3,5-5,5 (mg/dL) (%) | 42,7 | 43,0 | 42,1 |
| >5,5 (mg/dL) (%) | 20,0 | 20,5 | 18,9 |
| KDIGO (categorías de fósforo) |  |  |  |  |
| <3,0 (mg/dL) (%) | 24,4 | 24,7 | 23,6 | 0,4 |
| 3,0-4,5 (mg/dL) (%) | 39,7 | 38,5 | 42,3 |
| >4,5 (mg/dL) (%) | 35,9 | 36,7 | 34,0 |
| Fosfatasa alcalina (UI/L) (Mediana[IQR]) | 114,0[73,0] | 113,0[73,5] | 117,0[70,5] | 0,3 |
| Fosfatasa alcalina (UI/L) (Media±DS) | 153,5±128,5 | 151,7±121,5 | 157,7±143,2 | 0,4 |
| Albúmina (g/dL) (Media±DS) | 4,0±0,4 | 4,0±0,4 | 4,1±0,4 | 0,6 |
| Hemoglobina (g/dL) (Media±DS) | 10,9±1,9 | 10,8±1,9 | 11,0±1,8 | 0,1 |
