# Supplementary material
Source: Elsevier journal article supplement (https://www.sciencedirect.com/science/article/pii/S2013251418300555)
Supplement: mmc4 [file S2013251418300555:mmc4.docx]

**Tabla supl.4. *Características de los pacientes según el tiempo en diálisis dividido en terciles.***

|  | Todos (N=1483) | < 26 meses (N=507) | 27-64 meses (N=482) | >64 meses (N=494) | p-valor |
| --- | --- | --- | --- | --- | --- |
| Edad (años) (Media±DS) | 59,3±15,7 | 61,6±15,7 | 60,8±14,6 | 55,5±15,9 | <0,001 |
| Sexo (% de hombres) | 53,4 | 57,4 | 53,2 | 49,6 | 0,047 |
| Diabetes (%) | 31,8 | 38,0 | 37,8 | 19,7 | <0,001 |
| PTH (pg/mL) (Mediana[IQR]) | 125,9[240,9] | 93,0[136,2] | 118,3[195,2] | 210,1[400,4] | <0,001 |
| PTH (pg/mL) (Media±DS) | 264,5±409,1 | 169,9±245,8 | 220,3±351,0 | 404,4±538,3 | <0,001 |
| KDOQI (categorías de PTH) |  |  |  |  |  |
| <150 (pg/mL) (%) | 55,8 | 68,4 | 58,7 | 40,3 | <0,001 |
| 150-300 (pg/mL) (%) | 19,1 | 16,6 | 20,5 | 20,2 |
| >300 (pg/mL) (%) | 25,1 | 15,0 | 20,9 | 39,5 |
| KDIGO (categorías de PTH) |  |  |  |  |  |
| <130 (pg/mL) (%) | 51,1 | 63,0 | 53,4 | 36,6 | <0,001 |
| 130-585 (pg/mL) (%) | 37,9 | 31,8 | 39,2 | 42,7 |
| >585 (pg/mL) (%) | 11,0 | 5,1 | 7,3 | 20,6 |
| Calcio (mg/dL) (Media±DS) | 9,4±0,7 | 9,3±0,7 | 9,3±0,7 | 9,4±0,7 | 0,5 |
| Calcio corregido (mg/dL) (Media±DS) | 9,3±0,7 | 9,3±0,7 | 9,3±0,7 | 9,4±0,7 | 0,037 |
| KDOQI (categorías de calcio corregido por albúmina) | | | | | |
| <8,4 (mg/dL) (%) | 6,9 | 8,3 | 7,7 | 4,9 | 0,020 |
| 8,4-9,5 (mg/dL) (%) | 60,3 | 63,1 | 59,8 | 57,9 |
| >9,5 (mg/dL) (%) | 32,8 | 28,6 | 32,6 | 37,2 |
| KDIGO (categorías de calcio) |  |  |  |  |  |
| <8,5 (mg/dL) (%) | 8,0 | 8,1 | 9,3 | 6,7 | 0,7 |
| 8,5-10,2 (mg/dL) (%) | 81,9 | 82,1 | 80,3 | 83,2 |
| >10,2 (mg/dL) (%) | 10,1 | 9,9 | 10,4 | 10,1 |
| Fósforo (mg/dL) (Media±DS) | 4,2±1,7 | 4,2±1,7 | 4,2±1,7 | 4,2±1,7 | 0,8 |
| KDOQI (categorías de fósforo) |  |  |  |  |  |
| <3,5 (mg/dL) (%) | 37,3 | 37,7 | 36,7 | 37,4 | 0,7 |
| 3,5-5,5 (mg/dL) (%) | 42,9 | 41,8 | 42,1 | 44,7 |
| >5,5 (mg/dL) (%) | 19,8 | 20,5 | 21,2 | 17,8 |
| KDIGO (categorías de fósforo) |  |  |  |  |  |
| <3,0 (mg/dL) (%) | 24,3 | 24,5 | 22,6 | 25,7 | 0,7 |
| 3,0-4,5 (mg/dL) (%) | 39,9 | 39,8 | 42,1 | 37,9 |
| >4,5 (mg/dL) (%) | 35,8 | 35,7 | 35,3 | 36,4 |
| Fosfatasa alcalina (UI/L) (Mediana[IQR]) | 115,0[72,5] | 116,0[77,0] | 108,0[62,0] | 123,0[91,0] | 0,005 |
| Fosfatasa alcalina (UI/L) (Media±DS) | 153,3±127,5 | 145,8±102,5 | 146,4±130,8 | 167,6±145,1 | 0,015 |
| Albúmina (g/dL) (Media±DS) | 4,0±0,4 | 4,1±0,4 | 4,0±0,5 | 4,0±0,4 | 0,011 |
| Hemoglobina (g/dL) (Media±DS) | 10,9±1,8 | 10,9±1,9 | 11,0±1,7 | 10,8±1,9 | 0,2 |
